# Supplementary material
Source: ML conference proceedings conference paper supplement (https://openaccess.thecvf.com/content/CVPR2023/html/Wang_Out-of-Distributed_Semantic_Pruning_CVPR_2023_paper.html)
Supplement: Supplementary file 1 [file Wang_Out-of-Distributed_Semantic_Pruning_CVPR_2023_supplemental.pdf]

# Out-of-Distributed Semantic Pruning for Robust Semi-Supervised Learning

## Supplementary Materials

### A. The performance of OOD detection

To further measure the potential to identify OOD classes, we compare our OSP with T2T [4] in CIFAR100 with 100 labeled data per class. We utilize AUROC [3, 4] to evaluate performance for OOD detection. The results are shown in Table. 1. Our OSP surpasses the baseline [4] under all setting. This indicates that our OSP promotes OOD detection by keeping ID features and OOD semantic orthogonal.

| Method  | Class Mismatch Ratio |      |      |      |      |      |      |
|---------|----------------------|------|------|------|------|------|------|
|         | 0.3                  | 0.4  | 0.5  | 0.6  | 0.7  | 0.8  | 0.9  |
| T2T [4] | 65.5                 | 61.0 | 59.0 | 60.9 | 56.3 | 56.7 | 59.4 |
| Ours    | 68.3                 | 73.2 | 69.4 | 69.1 | 66.7 | 64.3 | 63.0 |

Table 1. AUROC(%) for OOD detection on CIFAR100 with 100 labeled data per class.

### B. Ablation Study

**Effect of soft weight  $\alpha$ .** The parameter  $\alpha$  is a hyper-parameters to adjust the drastic changes in the feature space caused by the orthogonal operation (in Eq. ??). We conduct ablation experiments on different soft weights  $\alpha$  to explore the effect of it on OSP. As shown in Fig. 1(a), small  $\alpha$  weakens the effect of our OSP, while large  $\alpha$  leads to dramatic changes in feature space. Given our observation of the trade-off, we adopt  $\alpha = 0.8$  in all our experiments.

### C. Further Analysis

**Analysis of the angle of ID and OOD features.** As shown in Fig. 1 (b), we see the baseline T2T has an angle around  $50^\circ$ , the cosine similarity is 64% (i.e.,  $\cos(50^\circ)$ ), which means there is an amount of meaning aliasing between ID and OOD features. In contrast, the feature angles after our OSP are around  $80^\circ$ , which remarkably suppresses their similarity to about only 17% (i.e.,  $\cos(80^\circ)$ ). This indicates that our model effectively prunes OOD semantics out from ID features, enhancing the discrimination of ID and OOD samples.

**Analysis on the inter-class variance.** As shown in

Fig. 1 (c), our OSP obtains a significantly larger inter-class variance than the baseline [4], reflecting OSP obtains inter-class discrimination with higher generalizability [9]. Another interesting property is that OSP encourages the inter-class variance to increase within training, whereas the baseline [4] does not. This suggests that OSP progressively acquires discriminative ID class semantics during training.

### D. Datasets

#### D.1. intra-dataset setting

For intra-dataset setting, we follow [3] [2] to evaluate OSP on image classification datasets: MNIST [6], CIFAR10 [5], CIFAR100 [5] and TinyImageNet(a subset of ImageNet [1]), with different class mismatch ratio  $\gamma$ .

**MNIST** includes 60,000 training images and 10,000 testing images of size  $28 \times 28$ , which contains 10 categories from digit 0 to digit 9. In this paper, we consider the first six categories (from digit 0 to digit 5) as  $\mathcal{C}^l$  and the remaining categories as OOD categories,  $\mathcal{C}^{ood}$ . Moreover, we respectively select ten images from  $\mathcal{C}^l$  to construct the labeled data set  $\mathcal{D}^l$ , i.e., a total of 60 labeled data, and select 30,000 images in total from digit 0 to digit 9 as unlabeled data  $\mathcal{D}^u$ . Moreover, we use the mismatch ratio  $\gamma$  to adjust the ratio of OOD samples in the unlabeled data to modulate class distribution mismatch. For example, when the extent of labeled/unlabeled class mismatch ratio is 0%, all unlabeled data come from digit 0 to digit 5.

**CIFAR10** includes 60,000 training images and 10,000 testing images of size  $32 \times 32$  which contains ten categories: *airline, automobile, bird, cat, deer, dog, frog, horse, ship and trunk*. Our experiment carries out six-categories classification tasks. We consider animal categories (*birds, cats, deer, dogs, frogs and horses*) as ID categories and the rest as OOD categories. We select 400 images from each ID category to construct the labeled data set  $\mathcal{D}^l$ , i.e., 2400 labeled instances. Meanwhile, 20,000 images in total are randomly selected as the unlabeled data set  $\mathcal{D}^u$  from all the ten categories. We adjust the ratio of OOD images in the unlabeled data to modulate class distribution mismatch  $\gamma$ .

**CIFAR100** includes 50,000 training images and 10,000 testing images of size  $32 \times 32$  which contains 100 cate-

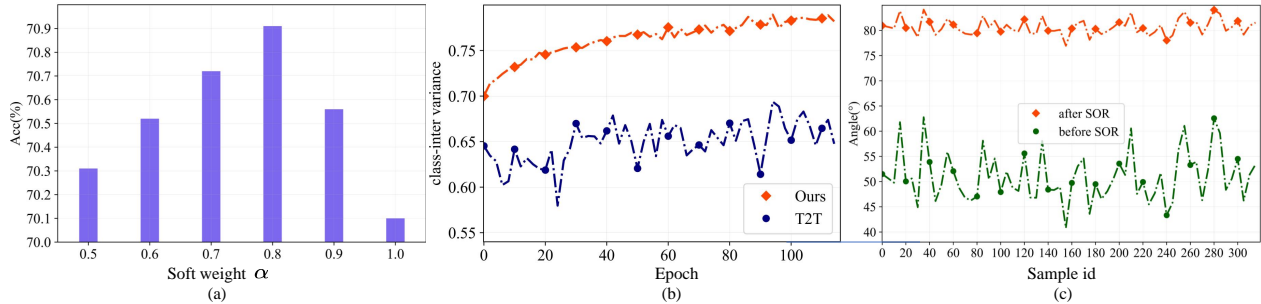

Figure 1. (a) The ablation study about soft weight  $\alpha$ . (b) The class-inter variance between ID features. (c) The angle between ID and OOD features. All these results are obtained on CIFAR100 with 100 labeled data per class and  $\gamma=0.6$ .

gories. We use the first half categories (1-50) as ID categories, and the remaining classes as OOD categories. We select 100 images from each ID category to construct the labeled data set  $\mathcal{D}^l$ , i.e., 5000 labeled instances. Meanwhile, 20,000 images in total are randomly selected as the unlabeled data set  $\mathcal{D}^u$  from all the 100 categories with different ratios of OOD classes.

**TinyImagetNet** contains 200 categories which includes 500 training images and 50 testing images in each category. We resize all images to  $32 \times 32$ . We use the first 100 categories as ID classes, and the remaining classes as OOD categories. We select 100 images from each ID category to construct the labeled data set  $\mathcal{D}^L$ , i.e., 10000 labeled instances. Meanwhile, 40,000 images in total are randomly selected as the unlabeled data set  $\mathcal{D}^u$  from all the 200 categories with different ratios of OOD classes.

## D.2. inter-dataset setting

For inter-dataset setting, we follow [4] to evaluate OSP on CIFAR10 [5] with different amounts of labeled data. Here, CIFAR10 [5] is used as ID samples, and we samples 10,000 images from other dataset as OOD samples, e.g. the TIN dataset, the Large-scale Scene Understanding (LSUN) dataset [7], Gaussian noise dataset, and uniform noise dataset, forming into our inter-dataset settings. For CIFAR10 [5], following the original split, 10,000 images are used for testing and the same splits in [4] [8] are adopted for training and validating.

## E. Algorithm

We provide our training algorithm in Alg. 1. The training processing consists of two stages: pre-training stage and fine-tuning stage.

## References

[1] Jia Deng, Wei Dong, Richard Socher, Li-Jia Li, Kai Li, and Li Fei-Fei. Imagenet: A large-scale hierarchical image database. *computer vision and pattern recognition*, 2009. 1

[2] Lan-Zhe Guo, Zhen-Yu Zhang, Yuan Jiang, Yu-Feng Li, and Zhi-Hua Zhou. Safe deep semi-supervised learning for unseen-class unlabeled data. In *International Conference on Machine Learning*, pages 3897–3906. PMLR, 2020. 1

[3] Rundong He, Zhongyi Han, Xiankai Lu, and Yilong Yin. Safe-student for safe deep semi-supervised learning with unseen-class unlabeled data. In *Proceedings of the IEEE/CVF Conference on Computer Vision and Pattern Recognition*, pages 14585–14594, 2022. 1

[4] Junkai Huang, Chaowei Fang, Weikai Chen, Zhenhua Chai, Xiaolin Wei, Pengxu Wei, Liang Lin, and Guanbin Li. Trash to treasure: Harvesting ood data with cross-modal matching for open-set semi-supervised learning. In *Proceedings of the IEEE/CVF International Conference on Computer Vision*, pages 8310–8319, 2021. 1, 2

[5] Alex Krizhevsky. Learning multiple layers of features from tiny images. 2009. 1, 2

[6] Hayden Walles, Anthony Robins, Alistair Knott, Hayden Walles, Anthony Robins, and Alistair Knott. the mnist handwritten digit database. 2011. 1

[7] Fisher Yu, Ari Seff, Yinda Zhang, Shuran Song, Thomas Funkhouser, and Jianxiong Xiao. Lsun: Construction of a large-scale image dataset using deep learning with humans in the loop. *arXiv preprint arXiv:1506.03365*, 2015. 2

[8] Qing Yu, Daiki Ikami, Go Irie, and Kiyoharu Aizawa. Multi-task curriculum framework for open-set semi-supervised learning. In *European Conference on Computer Vision*, pages 438–454. Springer, 2020. 2

[9] Shaofeng Zhang, Lyn Qiu, Feng Zhu, Junchi Yan, Hengrui Zhang, Rui Zhao, Hongyang Li, and Xiaokang Yang. Align representations with base: A new approach to self-supervised learning. 2022. 1

---

**Algorithm 1** Training algorithm
 

---

**Input:** Labeled data,  $\mathbb{D}^l$ , a set of unlabeled data  $\mathbb{D}^u$ , an encoder  $\mathcal{G}(\cdot)$ , a K-ways classifier  $\mathcal{F}(\cdot)$ , a rotation prediction head  $\mathcal{H}(\cdot)$ , an OOD detection module  $\mathcal{M}(\cdot)$ , pre-training epochs  $E_1$ , Fine-tuning epochs  $E_2$ , max iteration per epochs  $I$ , temperature  $T$ .

**Output:** Trained encoder  $\mathcal{G}(\cdot)$  and Trained K-ways classifier  $\mathcal{F}(\cdot)$ .

```

1: ***** Pre-training Stage *****
2: for  $e = 1 \dots E_1$  do
3:   for  $i = 1 \dots I$  do
4:     compute  $\mathcal{L}_{pre} = \mathcal{L}_{ce} + \mathcal{L}_{rot} + \mathcal{L}_{ood}^l$  ▷ Eq. 13
5:     update  $\mathcal{G}(\cdot), \mathcal{F}(\cdot), \mathcal{H}(\cdot), \mathcal{M}(\cdot) \leftarrow$  SGD with  $\mathcal{L}_{pre}$ .
6: ***** Fine-tuning Stage *****
7: Initialize OOD samples set  $\mathbb{U}^{ood} = \emptyset$ .
8: for  $e = 1 \dots E_2$  do
9:   if  $e \% 10 = 0$  then
10:    update  $\mathbb{U}^u, \mathbb{U}^{ood} \leftarrow$  split old unlabeled data  $\mathbb{D}^u$  with  $\mathcal{M}(\cdot)$ . ▷ Eq. 6
11:   if  $\mathbb{U}^{ood} \neq \emptyset$  then
12:    select recyclable OOD samples for  $\mathbb{U}^{ood}$  and update recyclable OOD Bank  $\mathcal{B}(c)$  ( $c = 1 \dots K$ ). ▷ Eq. 5
13:
14:   for  $i = 1 \dots I$  do
15:      $(\mathbf{B}_l = \{x^l, y^l\}, \mathbf{B}_u = \{x^u\}) \leftarrow$  SampleBatch( $\mathbb{D}^l, \mathbb{D}^u$ ).
16:      $z_i^l = \mathcal{G}(x_i^l)$  and  $z_j^u = \mathcal{G}(x_j^u)$ , where,  $x_i^l \in \mathbf{B}_l, x_j^u \in \mathbf{B}_u$ .
17:     for  $c = 1 \dots K$  do // compute anchor ID samples set
18:        $\mathcal{A}_c^l = \{z_i^l | z_i^l = \mathcal{G}(x_i^l), y_i^l = c, p_i^l[c] > \delta\}$ , ▷ Eq. 2
19:        $\mathcal{A}_c^u = \{z_j^u | z_j^u = \mathcal{G}(x_j^u), \hat{y}_j^u = c, p(z_j^u) > \delta\}$ , ▷ Eq. 3
20:        $\mathcal{A}_c = \mathcal{A}_c^l \cup \mathcal{A}_c^u$ . ▷ Eq. 4
21:     obtain all anchor ID samples set  $\mathcal{A} = \{\mathcal{A}_c\}_{c=1}^K$ .
22:     compute ID-OOD pairs  $t_i$  for each  $z_i$  in  $\mathcal{A}$  // our AOM module ▷ Eq. 6
23:     compute pruned ID features  $z_{i,r}$  for each  $t_i$  in  $\mathcal{A}$ . // our SOT module ▷ Eq. 8,9
24:     compute  $\mathcal{L}_{ft} = \underbrace{\mathcal{L}_{ce} + \mathcal{L}_u}_{\text{Classic SSL Loss}} + \underbrace{\mathcal{L}_{ood}^l + \mathcal{L}_{ood}^u}_{\text{OOD Detection Loss}} + \underbrace{\mathcal{L}_{odc}^l + \mathcal{L}_{odc}^u}_{\text{Our OSR Loss}} + \mathcal{L}_{rot}$  ▷ Eq. 13
25:     update  $\mathcal{G}(\cdot), \mathcal{F}(\cdot), \mathcal{H}(\cdot), \mathcal{M}(\cdot) \leftarrow$  SGD with  $\mathcal{L}_{ft}$ .
26: return encoder  $\mathcal{G}(\cdot)$  and K-ways classifier  $\mathcal{F}(\cdot)$ 

```

---
